# Supplementary material
Source: ML conference proceedings conference paper supplement (https://www.ecva.net/papers/eccv_2022/papers_ECCV/html/136830290_ECCV_2022_paper.php)
Supplement: Supplementary file 1 [file 136830290-supp.zip]

# DuelGAN: A Duel Between Two Discriminators Stabilizes the GAN Training

Jiaheng Wei<sup>[0000-0003-3573-1711]</sup>, Minghao Liu<sup>[0000-0002-1629-2429]</sup>,  
Jiahao Luo<sup>[0000-0003-3374-6135]</sup>, Andrew Zhu<sup>[0000-0002-6664-3215]</sup>,  
James Davis<sup>[0000-0002-1413-2616]</sup>, and Yang Liu<sup>[0000-0001-8420-6011]</sup>

University of California, Santa Cruz, Santa Cruz CA 95060, USA

\*: equal contributions

Correspondence to yangliu@ucsc.edu

**Abstract.** In this paper, we introduce DuelGAN, a generative adversarial network (GAN) solution to improve the stability of the generated samples and to mitigate mode collapse. Built upon the Vanilla GAN’s two-player game between the discriminator  $D_1$  and the generator  $G$ , we introduce a peer discriminator  $D_2$  to the min-max game. Similar to previous work using two discriminators, the first role of both  $D_1$ ,  $D_2$  is to distinguish between generated samples and real ones, while the generator tries to generate high-quality samples which are able to fool both discriminators. Different from existing methods, we introduce a duel between  $D_1$  and  $D_2$  to discourage their agreement and therefore increase the level of diversity of the generated samples. This property alleviates the issue of early mode collapse by preventing  $D_1$  and  $D_2$  from converging too fast. We provide theoretical analysis for the equilibrium of the min-max game formed among  $G$ ,  $D_1$ ,  $D_2$ . We offer convergence behavior of DuelGAN as well as stability of the min-max game. It’s worth mentioning that DuelGAN operates in the unsupervised setting, and the duel between  $D_1$  and  $D_2$  does not need any label supervision. Experiments results on a synthetic dataset and on real-world image datasets (MNIST, Fashion MNIST, CIFAR-10, STL-10, CelebA, VGG) demonstrate that DuelGAN outperforms competitive baseline work in generating diverse and high-quality samples, while only introduces negligible computation cost. Our code is publicly available at <https://github.com/UCSC-REAL/DuelGAN>.

**Keywords:** GAN, Image Generation, Peer Discriminator, Stability.

## 1 Introduction

Vanilla GAN (Generative Adversarial Nets [16]) proposed a data generating framework through an adversarial process which has achieved great success in image generation [16,23,51,15,6,63,49,38,47,4,18,12], image translation [64,62,11,54], and other real-life applications [22,35,48,43,3,58,29,42,61,31,53]. However, training Vanilla GAN is usually accompanied with a number of common problems, for example, vanishing gradients, mode collapse and failure to converge. Unfortunately, none of these issues have been completely addressed. There is a large

amount of follow up work on Vanilla GAN. Due to space limitations, we only discuss the two most related lines of works.

**Stable and Diverse GAN Training.** Several stabilization techniques have been implemented in GAN variants. Modifying architectures is the most extensively explored category. Radford et al. [45] make use of convolutional and convolutional-transpose layer in training the discriminator and generator. Karras et al. [23] adopt a hierarchical architecture and trains the discriminator and generator with progressively increasing size. Huang et al. [21] proposed a generative model which consists of a top-down stack of GANs. Chen et al. [8] split the generator into the noise prior and also latent variables. The optimization task includes maximizing the mutual information between latent variables and the observation. Designing suitable loss functions is another favored technique. Successful designs include  $f$ -divergence based GAN [41,36] (these two approaches replace loss functions of GAN by estimated variational  $f$ -divergence or least-square loss respectively), introducing auxiliary terms in the loss function [37] and integral probability metric based GAN [5,18,26,44]. A detailed survey of methods for stabilizing GANs exists [57].

**Multi-Player GANs.** Multi-player GANs explore the situation where there are multiple generators or multiple discriminators. The first published work to introduce multiple discriminators to GANs is multi-adversarial networks, in which discriminators can range from an unfavorable adversary to a forgiving teacher [13]. Nguyen et al. [40] formulate D2GAN, a three-player min-max game which utilizes a combination of Kullback-Leibler (KL) and reverse KL divergences in the objective function and is the most closely related to our work. Albuquerque et al. [1] show that training GAN variants with multiple discriminators is a practical approach even though extra capacity and computational cost are needed. Employing multiple generators and one discriminator to overcome the mode collapse issue and encourages diverse images has also been proposed [20,14].

In contrast to the above existing work, we demonstrate the possibility of improving GAN training with a computationally light modification by adding only one competing discriminator. We introduce a duel game among two discriminators and demonstrate the benefits of doing so in stabilizing and diversifying the training. Our main contributions summarize as follows:

- We introduce a duel between two discriminators to encourage diverse predictions and avoid early failure. The intuition is that predictions with high consensus will be discouraged, and effectively both discriminators are rewarded for having diverse predictions. The introduced game between the two discriminators results in a different convergence pattern for the generator.
- Theoretically, we derive the equilibrium for discriminators and the generator. We show how DuelGAN alleviates the vanishing gradient issue and mode collapse intuitively and empirically. We derive evidence for how the peer discriminator helps the dynamics of the learning. In addition, we demonstrate

that if the peer discriminator is better than a random guess classifier, the intermediate game and the objective function in DuelGAN are stable/robust to a bad peer discriminator.

- Experimental results on a synthetic dataset validate that DuelGAN addresses mode collapse. Results on real datasets demonstrate that DuelGAN generates high-quality image samples compared with baseline works. Besides, the introduced duel-game could also be viewed as a regularizer which complements well with existing methods and further improves the performance.

## 2 Background

We first review Vanilla GAN and D2GAN, which are the most relevant to understanding our proposed DuelGAN.

**Vanilla GAN [16].** Let  $\{x_i\}_{i=1}^n \subseteq \mathcal{X}$  denote the given training dataset drawn from the unknown distribution  $p_{\text{data}}$ . Traditional GAN formulates a two-player game: a discriminator  $D$  and a generator  $G$ . To learn the generator  $G$ 's distribution over  $\mathcal{X}$ ,  $G$  maps a prior noise distribution  $p_z(z)$  to the data space.  $\forall x \in \mathcal{X}$ ,  $D(x)$  returns the probability that  $x$  belongs to  $p_{\text{data}}$  rather than  $p_g$ , where  $p_g$  denotes the distribution of  $G(z)$  implicitly defined by  $G$ . GAN trains  $D$  to maximize the probability of assigning the correct label to both training samples and those from the generator  $G$ . Meanwhile, GAN trains  $G$  to minimize  $\log(1 - D(G(z)))$ .

$$\min_G \max_D V(D, G) = \mathbb{E}_{x \sim p_{\text{data}}} [\log D(x)] + \mathbb{E}_{z \sim p_z} [\log (1 - D(G(z)))]. \quad (1)$$

**D2GAN [40].** D2GAN is the most closely related method to DuelGAN. This three-player game aims to solve the mode collapse issue and the optimization task is equivalent to minimize both KL divergence and Reverse-KL divergence between  $p_{\text{data}}$  and  $p_g$ . The formulation of D2GAN comes as follows:

$$\begin{aligned} \min_G \max_{D_1, D_2} V(D_1, D_2, G) = & \alpha \cdot \mathbb{E}_{x \sim p_{\text{data}}} [\log D_1(x)] + \mathbb{E}_{z \sim p_z} [-D_1(G(z))] \\ & + \mathbb{E}_{x \sim p_{\text{data}}} [-D_2(x)] + \beta \cdot \mathbb{E}_{z \sim p_z} [\log D_2(G(z))], \end{aligned} \quad (2)$$

with  $0 \leq \alpha, \beta \leq 1$ . Given a sample  $x$  in data space,  $D_1(x)$  rewards a high score if  $x$  is drawn from  $p_{\text{data}}$ , and gives a low score if generated from the generator distribution  $p_g$ . In contrast,  $D_2(x)$  returns a high score for  $x$  generated from  $p_g$  and gives a low score for a sample drawn from  $p_{\text{data}}$ . A large  $\alpha$  induces multiple modes of  $p_g$ , but may include undesirable samples, while a large  $\beta$  induces the single mode. However, it is non-trivial to make a balance of these two terms in practice; if  $D_i$  fails/crashes (unstable), the overall training is influenced. And  $D_i$  won't be corrected since there is no interaction between discriminators!

Our work is similar to D2GAN in containing a pair of discriminators, instead of discriminators with different goals, we use identical discriminators and introduce a duel/competition between them.

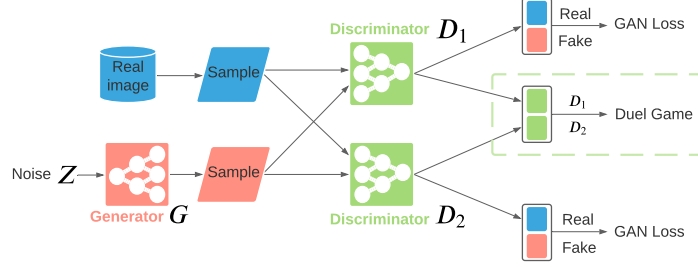

**Fig. 1.** Illustration of the proposed DuelGAN. Compared with Vanilla GAN, DuelGAN has one more identical discriminator and a Duel Game between two discriminators. The introduced Duel Game induces diversified generated samples by discouraging the agreement between  $D_1$  and  $D_2$ . In D2GAN, although both discriminators are trained with different loss functions, they do not interfere with each other in the training.

### 3 DuelGAN: A Duel Between Two Discriminators

In this section, we first give the formulation and intuition of DuelGAN. Then we will present the equilibrium strategy of the generator and the discriminators.

#### 3.1 Formulation

Similar to related works, we assume that the data follows the distribution  $p_{\text{data}}$ , our ultimate goal is to achieve  $p_g = p_{\text{data}}$  where  $p_g$  is the generator's distribution. DuelGAN formulates a three-player game which consists of two discriminators  $D_1, D_2$  and one generator  $G$ . Denote by  $p_{\text{duel}}$  an equal mixture of  $p_{\text{data}}, p_g, \forall x: p_{\text{duel}}(x) = [p_{\text{data}}(x) + p_g(x)]/2$ . Recall that  $p_z$  denotes the prior noise distribution, now we are ready to formulate the min-max game of DuelGAN as follows:

$$\begin{aligned} & \min_G \max_{D_1, D_2} \mathcal{L}(D_1, D_2, G) \\ &= \min_G \max_{D_1, D_2} \mathbb{E}_{x \sim p_{\text{data}}} [\log D_1(x)] + \mathbb{E}_{x \sim p_{\text{data}}} [\log D_2(x)] \\ & \quad + \beta \cdot \text{Duel-D} + \mathbb{E}_{z \sim p_z} [\log (1 - D_1(G(z)))] + \mathbb{E}_{z \sim p_z} [\log (1 - D_2(G(z)))], \quad (3) \end{aligned}$$

where Duel-D introduces the duel (a peer competition game) among  $D_1, D_2$ , defined as:

$$\begin{aligned} \text{Duel-D} = & \mathbb{E}_{x \sim p_{\text{duel}}} \left[ \underbrace{\ell\left(D_1(x), \mathbb{1}\left(D_2(x) > \frac{1}{2}\right)\right)}_{\text{Term 1a}} - \alpha \cdot \underbrace{\ell\left(D_1(x_{p_1}), \mathbb{1}\left(D_2(x_{p_2}) > \frac{1}{2}\right)\right)}_{\text{Term 1b}} \right] \\ & + \mathbb{E}_{x \sim p_{\text{duel}}} \left[ \underbrace{\ell\left(D_2(x), \mathbb{1}\left(D_1(x) > \frac{1}{2}\right)\right)}_{\text{Term 2a}} - \alpha \cdot \underbrace{\ell\left(D_2(x_{p_1}), \mathbb{1}\left(D_1(x_{p_2}) > \frac{1}{2}\right)\right)}_{\text{Term 2b}} \right]. \quad (4) \end{aligned}$$



In Duel-D,  $x_{p_1}$  and  $x_{p_2}$  are drawn randomly from  $p_{\text{duel}}$  and that  $x, x_{p_1}$  and  $x_{p_2}$  are independent with each other.  $\mathbb{1}(\cdot)$  is the indicator function,  $\alpha, \beta \in [0, 1]$  are hyper-parameters controlling the disagreement level and the weight of the competition game between two discriminators, respectively.  $\ell$  is an evaluation function, for simplicity, we adopt  $\ell = \log(\cdot)$ , as commonly used in other terms in the min-max game. Thus, for  $i \in \{0, 1\}$ , we have:

$$\ell(D_i(x), y) = \begin{cases} \log(D_i(x)) & \text{if } y = 1; \\ \log(1 - D_i(x)) & \text{if } y = 0. \end{cases} \quad (5)$$

To clarify the differences among Vanilla GAN [16], D2GAN [40] and DuelGAN, we use an workflow to illustrate in Figure 1. The key differences in DuelGAN’s formulation can be summarized as follows:

- Compared with Vanilla GAN (see Eqn.(1)), DuelGAN (see Eqn.(3)) introduces a peer discriminator  $D_2$  which has the same objective function as  $D$  appeared in Eqn.(1). An intermediate duel game Duel-D is added which will be explained below.
- The differences between D2GAN (see Eqn.(2)) and DuelGAN are highlighted with the underscores in red. Primarily, there is no interaction between discriminators in D2GAN, while our Duel-D term introduces another duel game between the discriminators, which we explain below. In addition to Duel-D, the objective function in DuelGAN encourages both discriminators to fit perfectly on both training samples and generated samples. While in D2GAN, one discriminator fits overly on training samples, the other fits overly on generated samples.

**Competition Introduced by Duel-D.** Duel-D bridges  $D_1$  and  $D_2$  by introducing 4 terms specified in Eqn.(4). Since we do not expect arbitrarily different discriminators, and both  $D_i$ s should play against the generator  $G$ , Term 1a and Term 2a encourage agreements between  $D_1$  and  $D_2$ . With only these two terms,  $D_1$  and  $D_2$  will eventually be encouraged to converge to agree with each other. Mode collapse issue remains a possibility. DuelGAN introduces Term 1b and Term 2b to the objective function which punish  $D_1$  and  $D_2$  from over-agreeing with each other (where the duel happens), especially at the early phase of training. Particularly, the Term 1b and 2b are evaluating the agreements of  $D_1$  and  $D_2$  on two entirely independent samples  $x_{p_1}, x_{p_2}$ . Because of the independence, the two discriminators’ predictions should not match with high probability. Note that the calculation of Duel-D does not need label supervisions, which distinguishes our work from other works that introduces multiple discriminators but would require additional label supervisions [11].

We provide more details of our intuition as well as theoretical evidences of this property in Section 4.

### 3.2 The Max Game of Discriminators

Denote the true label of  $x$  as  $y = 1$  if  $x$  comes from  $p_{\text{data}}$ , otherwise,  $y = 0$ . For any given generator  $G$ , let us first analyze the best responding/optimal discriminator  $D_{i,G}^*(x)$ ,  $i \in 1, 2$ . We define the following quantities:

$$r_{i,G}(x) := \mathbb{P}_{x \sim p_{\text{duel}}} \left( \mathbb{1}(D_i(x) > \frac{1}{2}) = 1 \right), \quad p_{i,G} := \mathbb{E}_{x \sim p_{\text{duel}}} [r_{i,G}(x)], \quad (6)$$

where  $r_{i,G}(x)$  represents the probability/confidence of  $x$  being categorized as the real data by  $D_i$  and  $p_{i,G}$  is the expectation of  $r_{i,G}(x)$  for  $x \sim p_{\text{duel}}$ . Let  $\hat{r}_{i,G}^*(x) := r_{i,G}(x) - \alpha \cdot p_{i,G}$ . Given discriminator  $D_i$ , when there is no confusion, we use  $D_j$  to denote the peer discriminator without telling  $j \neq i$  in later sections.

**Proposition 1** *For  $G$  fixed, denote by  $w := \beta \cdot (1 - \alpha)$ , the optimal discriminators  $D_1, D_2$  are given by:*

$$D_{i,G}^*(x) = \frac{p_{\text{data}}(x) + \beta \cdot \hat{r}_{j,G}^*(x) \cdot p_{\text{duel}}(x)}{p_{\text{data}}(x) + p_g(x) + w \cdot p_{\text{duel}}(x)}, \quad i = 1, 2. \quad (7)$$

### 3.3 The Min Game of the Generator

Remember that the training objective for  $D_i$  can be interpreted as maximizing the log-likelihood for estimating the conditional probability  $\mathbb{P}(Y = y|x)$  where  $Y$  indicates whether  $x$  comes from  $p_{\text{data}}$  (with  $y = 1$ ) or from  $p_g$  (with  $y = 0$ ). With the introduce of Duel Game, the distributions  $p_{\text{data}}$  and  $p_g$  in the Vanilla GAN got changed due to the appearance of  $p_{\text{duel}}$ . Thus, we define the corresponding updated distributions in DuelGAN w.r.t. discriminator  $D_i$  as  $p_{\text{data}_i}$  and  $p_{g_i}$ , respectively. For a clean presentation, we defer the exact form of  $p_{\text{data}_i}$ ,  $p_{g_i}$  in Appendix (Eqn. (22)).

Denote  $C(G) := \max_D \mathcal{L}(G, D_1, D_2)$ , the inner-max game ( $C(G)$ ) can be rewritten as (straightforward in the proof of Proposition 1 which is available in the Appendix B.1):

$$\begin{aligned} C(G) = & \mathbb{E}_{x \sim p_{\text{data}_1}} [\log D_{1,G}^*(x)] + \mathbb{E}_{x \sim p_{g_1}} [\log (1 - D_{1,G}^*(x))] \\ & + \mathbb{E}_{x \sim p_{\text{data}_2}} [\log D_{2,G}^*(x)] + \mathbb{E}_{x \sim p_{g_2}} [\log (1 - D_{2,G}^*(x))]. \end{aligned} \quad (8)$$

**Theorem 1.** *When  $\alpha = 0$ ,  $r_{j,G}(x) = 1/2$ , the global minimum of the virtual training criterion  $C(G)$  is achieved if and only if  $p_{\text{data}} = p_g$ . At this point,  $C(G)$  achieves the value of  $-\log 16$ .*

**When  $r_{j,G}(x) = 1/2$ ?** Note that  $r_{j,G}(x)$  is merely representing the probability that  $D_j$  classifies  $x$  to be real samples,  $p_{j,G}$  is the probability that  $D_j$  classifies a random sample as the real one. Without loss of generality, we assume real and generated samples are of uniform/equal prior. At the very beginning of the training process, the discriminator can do well in distinguishing real or generated

samples, since the generator at this time generates low-quality samples. In this case,  $r_{j,G}(x)$  is supposed to approach its max/min value, for example,  $r_{j,G}(x) \rightarrow 0$  if  $x$  is from generated samples, and otherwise,  $r_{j,G}(x) \rightarrow 1$ . During the training process, the generator progressively tries to mislead the predictions made by discriminators, which means the discriminator can not decide whether the sample is being fake or real. Thus,  $r_{j,G}(x) \rightarrow 1/2$ . At this time, for  $\alpha = 0, i = 1, 2$ , we have:

$$D_{i,G}^*(x) = \frac{p_{\text{data}}(x) + \beta \cdot \hat{r}_{j,G}^*(x) \cdot p_{\text{duel}}(x)}{p_{\text{data}}(x) + p_g(x) + \beta \cdot p_{\text{duel}}(x)} \rightarrow \frac{p_{\text{data}}(x) + \frac{\beta}{2} \cdot p_{\text{duel}}(x)}{p_{\text{data}}(x) + p_g(x) + \beta \cdot p_{\text{duel}}(x)}. \quad (9)$$

This allows us to rewrite  $C(G)/2$  as:  $\mathbb{E}_{x \sim p_{\text{data}_i}} \left[ \log \frac{p_{\text{data}}(x) + \frac{\beta}{2} \cdot p_{\text{duel}}(x)}{p_{\text{data}}(x) + p_g(x) + \beta \cdot p_{\text{duel}}(x)} \right] + \mathbb{E}_{x \sim p_{g_i}} \left[ \log \frac{p_g(x) + \frac{\beta}{2} \cdot p_{\text{duel}}(x)}{p_{\text{data}}(x) + p_g(x) + \beta \cdot p_{\text{duel}}(x)} \right]$ . Our subsequent proof is then based on the above reformulation. Due to space limits, we defer the formal statement of DuelGAN algorithm to the beginning of Appendix.

## 4 Properties of DuelGAN

In this section, we first illustrate how DuelGAN alleviates common issues in GAN training, for example, the vanishing gradients issue and the mode collapse issue. Then we present properties of DuelGAN including its stability guarantee and converging behavior.

### 4.1 DuelGAN and Common Issues in GAN Training

**Vanishing Gradients Issue.** In training GAN, discriminators might be too good for the generator to fool with and to improve progressively. When training with neural networks with back-propagation or gradient-based learning approaches, a vanishing small gradient only results in minor changes even with a large weight. As a result, the generator training may fail due to the vanishing gradients issue.

**Mode Collapse Issue.** Mode collapse refers to the phenomenon that the generator will rotate through a small set of output types. For the given fixed discriminator, the generator over-optimizes in each iteration. Thus, the corresponding discriminator fails to learn its way out of the trap.

**How DuelGAN Alleviates the Vanish Gradient and Mode Collapse.** DuelGAN alleviates the above two issues by preventing discriminators from "colluding" on its discrimination ability. In DuelGAN, for either discriminator  $D_i$ , recall that  $x_{p_1}$  and  $x_{p_2}$  are randomly drawn from  $p_{\text{duel}}$  which are independent

from each other. Then the max game of  $D_i$ , given its peer discriminator  $D_j$ , is to perform the following task:

$$\begin{aligned}
& \max_{D_i} \mathcal{L}(D_i, G)|_{D_j} \\
&= \overbrace{\max_{D_i} \mathbb{E}_{x \sim p_{\text{data}}} [\log D_i(x)] + \mathbb{E}_{z \sim p_z} [\log (1 - D_i(G(z)))]}^{\text{Term (a)}} \\
&+ \beta \cdot \mathbb{E}_{x \sim p_{\text{duel}}} \left[ \underbrace{\ell(D_i(x), \mathbb{1}(D_j(x) > \frac{1}{2}))}_{\text{Term (b)}} - \alpha \cdot \underbrace{\ell(D_i(x_{p_1}), \mathbb{1}(D_j(x_{p_2}) > \frac{1}{2}))}_{\text{Term (c)}} \right]. \quad (10)
\end{aligned}$$

Term (a) maximizes the probability of assigning the correct label to both real samples and generated samples. Term (b) maximizes the probability of matching predicted label with peer discriminator predicted ones. In other words, Term (b) controls the agreement level of  $D_i$  with respect to its peer discriminator  $D_j$ . However, note that Term (c) checks on the predictions of  $D_j$  on two different tasks  $x_{p_1}, x_{p_2}$ . When  $D_i$  agrees/fits overly on  $D_j$ , Term (c) returns a lower value if  $D_j$ 's predictions on these two different tasks are matching, mathematically,  $\mathbb{1}(D_j(x_{p_1}) > 1/2) = \mathbb{1}(D_j(x_{p_2}) > 1/2)$ . And Term (c) will return a high value if  $D_j$ 's predictions on these two different tasks are indeed different  $\mathbb{1}(D_j(x_{p_1}) > 1/2) \neq \mathbb{1}(D_j(x_{p_2}) > 1/2)$ . The weight  $\alpha$  controls this disagreement level compared with Term (b) by referring to the fact that a larger  $\alpha$  encourages more disagreement/diverse predictions from discriminators.

Based on the above intuitions, when two discriminators are of a high disagreement level, there exists a set  $S_{\text{dis}}$  such that  $\mathbb{1}(D_i(x) > 1/2) \neq \mathbb{1}(D_j(x) > 1/2)$  for  $x \in S_{\text{dis}}$  and  $S_{\text{dis}}$  is non-negligible. Therefore, there exists at least one discriminator  $D_i$  that can't perfectly predict labels (real/generated) of given data samples. The generator will then be provided with sufficient information, e.g., information or features that can be extracted from  $S_{\text{dis}}$ , to progress. This property helps us address the vanishing gradients issue. As for the mode collapse issue, suppose the over-optimized generator is able to find plausible outputs for both discriminators in the next generation. However, note that optimization is implemented on mini-batches in practice, the randomly selected samples  $x_{p_1}, x_{p_2}$  in Duel-D as well as the dynamically changing weights  $\alpha, \beta$  can bring a certain degree of randomness in the next generation. Thus, rotating through this subset of the generator's output types could not force Term (c) to remain unchanged, so that the discriminators won't maintain a constant disagreement level and they unlikely get stuck in a local optimum.

To theoretically demonstrate how DuelGAN alleviates the mode collapse issue, we borrow from [32] and formalize the mode collapse issue as:

**Definition 1.** Data distribution  $p_{\text{data}}$  and a generator  $p_g$  in vanilla GAN exhibit  $(\epsilon, \delta)$ -mode collapse for some  $0 \leq \epsilon < \delta \leq 1$  if  $\exists$  a set  $S \subseteq \mathcal{X}$  such that  $p_{\text{data}}(S) \geq \delta$  and  $p_g(S) \leq \epsilon$ .

A generator with a small  $\delta$  or a large  $\epsilon$  indicates a mild mode collapse issue (the better mode coverage). For  $D_i$  in DuelGAN, we could replace the distribution

$p_{\text{data}}, p_g$  by  $p_{\text{data},i} := c_{i,1} \cdot p_{\text{data}} + (1 - c_{i,1}) \cdot p_g$  and  $p_{g,i} := (1 - c_{i,2}) \cdot p_{\text{data}} + c_{i,2} \cdot p_g$ , respectively, for some distributions  $c_{i,1}(x), c_{i,2}(x) (\geq \frac{1}{2})$ , which implicitly encode the information of  $\beta, \hat{r}_{j,G}^*$  (appeared in Eqn. (7)). We have:

**Theorem 2.** *Suppose  $\exists S \subseteq \mathcal{X}$  such that the Vanilla GAN has the  $(\epsilon, \delta)$ -mode collapse, DuelGAN has  $(\epsilon_d, \delta_d)$ -mode collapse given  $S$ , where:*

$$\begin{aligned}\delta_d &:= \mathbb{E}_{x \in S}[c_{i,1}(x)] \cdot \mathbb{E}_{x \in S}[p_{\text{data}}(x)] + \mathbb{E}_{x \in S}[(1 - c_{i,1}(x))] \cdot \mathbb{E}_{x \in S}[p_g(x)] + \text{Cov}(c_{i,1}, p_{\text{data}} - p_g), \\ \epsilon_d &:= \mathbb{E}_{x \in S}[c_{i,2}(x)] \cdot \mathbb{E}_{x \in S}[p_g(x)] + \mathbb{E}_{x \in S}[(1 - c_{i,2}(x))] \cdot \mathbb{E}_{x \in S}[p_{\text{data}}(x)] + \text{Cov}(c_{i,2}, p_g - p_{\text{data}}).\end{aligned}$$

In the mode collapse scenario where  $D_j$  is fooled by  $G$  easily, we have  $c_{i,1}, c_{i,2} \rightarrow (1 + \frac{1}{2})/2 = \frac{3}{4}$  and Covariance terms become 0. Note that  $0 \leq \mathbb{E}_{x \in S}[p_g(x)] \leq \epsilon < \delta \leq \mathbb{E}_{x \in S}[p_{\text{data}}(x)] \leq 1$ , we then have:  $\delta_d < \delta$  and  $\epsilon_d > \epsilon$ , the mode collapse issue is alleviated with the introduce of duel game.

In Section 5.1, we use synthetic experiments to show that DuelGAN addresses mode collapse issues. And we include more empirical observations of the competition introduced by Duel-D in the Appendix C.5, i.e., the stability of the DuelGAN training, and the visualization of agreement levels between  $D_1$  and  $D_2$  due to the introduce of the duel game.

## 4.2 Stability and Convergence Behavior

In Section 4.1, we discussed the significant role of the introduced intermediate duel game. Now we discuss the potential downsides of introducing a second discriminator. Particularly, we are interested in understanding if the introduce of a peer discriminator  $D_j$  will disrupt the training and make the competition game with  $D_i$  unstable. Suppose  $D_j$  diverges from the optimum in the max game, in other words, the diverged peer discriminator  $\tilde{D}_j$  fails to provide qualified verification label  $Y_j^*$  (given by  $D_{j,G}^*$ ), and provides  $\tilde{Y}_j$  instead. Denote by:

$$e_{\text{data},j} := \mathbb{P}(\tilde{Y}_j = 0 | Y_j^* = 1), \quad e_{g,j} := \mathbb{P}(\tilde{Y}_j = 1 | Y_j^* = 0). \quad (11)$$

For any peer discriminator  $D_j$ ,  $D_j$  may be a diverged peer discriminator  $\tilde{D}_j$  or an optimal one  $D_{j,G}^*$ , we denote the Duel Game of  $D_i$  given  $D_j$  as:

$$\text{Duel}(D_i)|_{D_j} := \mathbb{E}_{x \sim p_{\text{duel}}} \left[ \ell \left( D_i(x), \mathbb{1}(D_j(x) > \frac{1}{2}) \right) - \alpha \cdot \ell \left( D_i(x_{p_1}), \mathbb{1}(D_j(x_{p_2}) > \frac{1}{2}) \right) \right]. \quad (12)$$

Theorem 3 explains the condition of stability (for  $D_i$ ) when its peer discriminator in DuelGAN diverges from the corresponding optimum.

**Theorem 3.** *Given  $G$ , suppose  $D_i$  has enough capacity, and at one step of Algorithm 1 (Appendix), if  $e_{\text{data},j} + e_{g,j} < 1$ ,  $\alpha = 1$ , the duel term of discriminator  $D_i$  is stable/robust with diverged peer discriminator  $\tilde{D}_j$ . Mathematically,*

$$\max_{D_i} \text{Duel}(D_i)|_{\tilde{D}_j} \text{ is equivalent with } \max_{D_i} \text{Duel}(D_i)|_{D_{j,G}^*}. \quad (13)$$

The above theorem implies that a diverging and degrading peer discriminator  $D_j$  will not disrupt the training of  $D_i$ .

*Remark 1.* Note that assuming uniform prior of real and generated samples, the condition to be stable is merely requiring that the proportion of false/wrong  $D_j$ 's prediction is less than a half (random guessing). This condition can be easily satisfied in practice. Thus, Theorem 3 provides the stability/robustness guarantee when the peer discriminator diverged from its optimum.

Build upon Theorem 1, with sufficiently small updates, Theorem 4 presents when  $p_g$  converges to  $p_{\text{data}}$ .

**Theorem 4.** *If  $G$  and  $D_i$ s have enough capacity, and at each step of Algorithm 1,  $D_i$ s are allowed to reach its optimum given  $G$ ,  $D_i$  is updated so as to improve the criterion in Eqn.(10), and  $p_g$  is updated so as to improve:*

$$\begin{aligned} C(G) = & \mathbb{E}_{x \sim p_{\text{data}_1}} [\log D_{1,G}^*(x)] + \mathbb{E}_{x \sim p_{g_1}} [\log (1 - D_{1,G}^*(x))] \\ & + \mathbb{E}_{x \sim p_{\text{data}_2}} [\log D_{2,G}^*(x)] + \mathbb{E}_{x \sim p_{g_2}} [\log (1 - D_{2,G}^*(x))]. \end{aligned} \quad (14)$$

If  $\beta = 0$  (remove the duel game to end the training and lead to convergence), we have  $D_{1,G}^* = D_{2,G}^*$ ,  $p_g$  converges to  $p_{\text{data}}$ .

## 5 Experiments

In this section, we empirically validate the properties of DuelGAN through a set of datasets, including a synthetic task and several real world datasets ranging from hand-written digits to human faces.

### 5.1 Experiment Results on Synthetic Data

We apply the experiment and model structures proposed in UnrolledGAN [37] to investigate whether the DuelGAN design can prevent mode collapse. This experiment aims to generate eight 2D Gaussian distributions with a covariance matrix  $0.02I$ , arranged around the same centroid with radius 2.0. Vanilla GAN fails on this example. D2GAN has been shown to outperform UnrolledGAN, so we include it as an alternate method which performs well.

Figure 2 shows symmetric KL-divergence, Wasserstein distance, and a visualization of results with Vanilla GAN, D2GAN, and DuelGAN. Knowing the target distribution  $p_{\text{data}}$ , we can employ symmetric KL divergence and Wasserstein distance, which calculate the distance between the true  $p_{\text{data}}$  and the normalized histogram of 10,000 generated points. On the left of Figure 2, the plots for symmetric KL-divergence and Wasserstein distance show that DuelGAN has a much better score than Vanilla GAN and slightly better than D2GAN.

On the right side of Figure 2 is a visualization of 512 generated blue samples points, together with red data points drawn from the true distribution. Vanilla GAN generates data points around only a single valid mode of the data distribution. D2GAN and DuelGAN distribute data around all eight mixture components, demonstrating the ability to resolve modal collapse in this case.

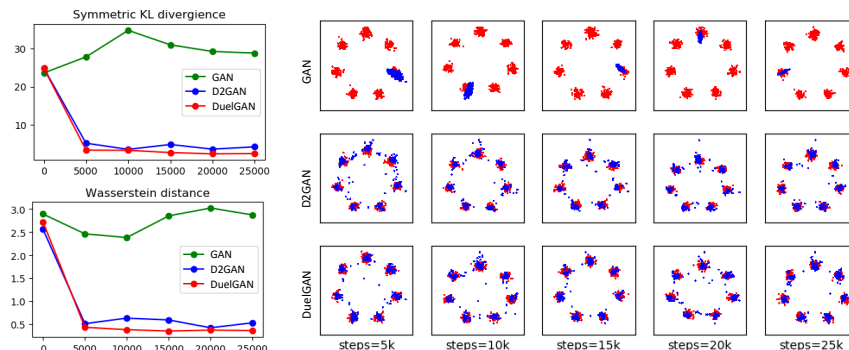

**Fig. 2.** Comparison of Vanilla GAN, D2GAN, and proposed DuelGAN on 2D synthesized data. The top-left graph shows the symmetric KL divergence over the training iterations, while the bottom left graph shows the Wasserstein distance. Both metrics compare the generated data points to data points drawn from the true target distribution. DuelGAN has the best performance. The right side visualizes generated blue data points and true red  $p_{\text{data}}$  data points. Note that Vanilla GAN has a clear mode collapse which both D2GAN and DuelGAN avoid.

## 5.2 Experiments on Real Image Datasets

We tested the proposed DuelGAN and baseline methods on MNIST [28], FashionMNIST [59], CIFAR-10 [27], STL-10 [10], CelebA [34] and VGGFace2 [7]. For quantitative evaluation, we adopt Fréchet Inception Distance (FID) [19] and Inception score (IS) [46] as the evaluation metric. FID summarizes the distance between the Inception features of the generated images and the real images. A lower FID indicates both better accuracy and higher diversity, so that a batch of generated images with good accuracy but identical to each other will have a poor FID score. A higher IS score indicates a higher generated image quality.

**Baseline Methods.** We reproduce/report the performance of a list of existing baseline methods, including: DCGAN [45], D2GAN [40], WGAN [18], DRAGAN [26], LSGAN [44], MicroBatchGAN [39], Dist-GAN [50], PresGAN [12], and QSGAN [17]. We used the same generator and discriminator backbone for all the comparison methods in each dataset unless specified by the original author. We recorded the best performing checkpoints when evaluating each method.

**Grey-Scale Images.** MNIST [28] and FashionMNIST [59] are small grey-scale image datasets including 60,000 training and 10,000 testing  $28 \times 28$  gray-scale images of hand-written digits and clothing. Since they are of small-scale, we adopt the shallow version of the generator and discriminators to generate the grey-scale images. We include a comprehensive comparison via FID score in Table 1. And the first two columns in Table 1 show our method has the best FID score among all tested methods. Figure 3 (left) shows FashionMNIST image results.

**Table 1.** Experiment FID score results of grey-scale image dataset: MNIST and FashionMNIST; natural scene image dataset: CIFAR-10 and STL-10; human face image dataset: CelebA and VGGFace2. Baseline results denoted with (\*) were extracted from the original paper report, not independently run in our experiments.

|                       | MNIST       | FasionMNIST  | CIFAR10      | STL-10       | CelebA       | VGG          |
|-----------------------|-------------|--------------|--------------|--------------|--------------|--------------|
| DCGAN [45]            | 19.86       | 24.78        | 27.45        | 59.79        | 17.38        | 49.99        |
| WGAN* [18]            | 14.07       | 28.24        | 35.37        | 60.21        | 15.23        | 39.24        |
| DRAGAN [26]           | 66.96       | 62.64        | 36.49        | 91.07        | 14.57        | 50.20        |
| D2GAN [40]            | 22.20       | 29.33        | 27.38        | 54.12        | 17.30        | 20.67        |
| Dist-GAN* [50]        | –           | –            | 22.95        | <b>36.19</b> | 23.70        | –            |
| PresGAN* [12]         | 42.02       | –            | 52.20        | –            | –            | –            |
| LSGAN [44]            | 23.80       | 43.00        | 51.42        | 70.37        | 15.35        | 55.96        |
| MicroBatchGAN* [39]   | 17.10       | –            | 77.70        | –            | 34.50        | –            |
| QSNGAN* [17]          | –           | –            | 31.97        | 59.61        | –            | –            |
| <b>DuelGAN (ours)</b> | <b>7.87</b> | <b>21.73</b> | <b>21.55</b> | 51.37        | <b>13.95</b> | <b>19.05</b> |

**Natural Scene Images.** CIFAR-10 [27] and STL-10 [10] are natural scene RGB image datasets. CIFAR-10 includes 50K training and 10K testing  $32 \times 32$  images with ten unique categories: airplane, automobile, bird, cat, deer, dog, frog, horse, ship, and truck. STL-10 is sub-sampled from ImageNet, and has more diverse samples than CIFAR-10, containing about 100K  $96 \times 96$  images. We adopt the deep version of the generator and discriminator to generate  $32 \times 32$  RGB images. Table 1 middle two columns show FID score results. Note that the introduce of competitive Duel Game in two discriminator GAN setup, brings performance boost in all the experiments. Figure 3 (middle) shows STL-10 image results.

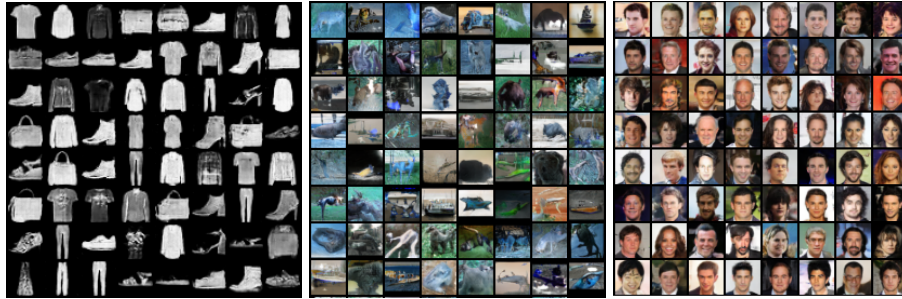

**Fig. 3.** Image results generated by proposed DuelGAN. Left: FashionMNIST, grey-scale clothing images; Middle: STL-10, natural scene images; Right: CelebA, large-scale celebrate face images.

**Human Face Images.** CelebA [34] and VGGFace2 [7] are large-scale face datasets. CelebA includes 162,770 training and 19,962 testing images of celebrity faces. VGGFace2 contains more than 3.3 million face images of celebrities caught



in the ‘wild’. There are different lighting conditions, emotions, and viewing angles. We randomly choose 200 categories from VGGFace2 and trained on the reduced dataset. We adopt the deep version of the generator and discriminators to generate  $32 \times 32$  RGB images on CelebA and  $64 \times 64$  RGB images on VGGFace2. Table 1 last two columns show our method has the best FID score among tested methods. Figure 3 (right) shows CelebA image results.

**Implementation Details** Our model architecture adopts the same generator and discriminator backbone as DCGAN [45]. In DuelGAN, the newly introduced discriminator is a duplicate of the first one. DuelGAN achieves low FID scores and high IS scores when  $\alpha$  and  $\beta$  are simply set to constant values. However we found that we could obtain an approximately 10% improvement through dynamic tuning. The parameter  $\beta$  controls the overall weight of Duel-D, while  $\alpha$  punishes the condition when  $D_1$  over-agrees with  $D_2$ . In the early training phase, when we have an unstable generator and discriminator, we set  $\alpha$  and  $\beta$  to 0. As training progresses, we gradually increase these parameters to a max value, which helps with vanishing gradients. After the midpoint of training we decrease these parameters to help the discriminators converge, until the parameters reach approximately 0 at the end of the training process. We adopt 0.3, 0.5 as the max value for  $\alpha$  and  $\beta$ , respectively.

### 5.3 Duel Game as a Regularizer

Intuitively, the introduced duel game could be well applied to a large family of GAN variants defined w.r.t a single discriminator  $D_1$  and a generator  $G$ . This is due to the fact that Eqn.(3) could be denoted by:

$$\min_G \max_{D_1, D_2} \mathcal{L}(D_1, D_2, G) = \min_G \max_{D_1, D_2} [\text{GAN}(D_1) + \beta \cdot \text{Duel-D} + \text{GAN}(D_2)], \quad (15)$$

where  $\text{GAN}(D_i) := \mathbb{E}_{x \sim p_{\text{data}}} [\log D_i(x)] + \mathbb{E}_{z \sim p_z} [\log (1 - D_i(G(z)))]$ . Thus, if we substitute the GAN loss  $\text{GAN}(D_i)$  by a state-of-the-art GAN variant, i.e., StyleGAN-ADA [24], one could view the duel game Duel-D as a regularizer.

We take the higher resolution version (256×256 RGB images) of CelebA [34] for illustration. Clearly in Table 2, StyleGAN-ADA reaches the state-of-the-art result on this task. And the introduced Duel-D regularizer could further improve its performance. Figure 4 shows the corresponding generated images.

We train StyleGAN-ADA with and w/o Dual-D regularizer on three datasets. Table 3 shows StyleGAN-ADA has higher recall score by introducing the Dual-D regularizer. This indicates the duel game regularizer could alleviate mode collapse issue and have a better mode coverage.

**More Experiment Results.** Due to space limits, we defer more experiment results to the Appendix C, including: an ablation study of hyper-parameters tuning; experiment validations about the stability of training; the visualization of the duel game between  $D_1$  and  $D_2$ .

**Table 2.** Experiment FID score results of CelebA ( $256 \times 256$  RGB images). Baseline results denoted with (\*) were obtained from the original paper report.

| Method | GLF* [60] | MSP* [30] | NCP-VAE* [2] | LSGM* [52] | StyleGAN-ADA [24] | StyleGAN-ADA+Duel-D |
|--------|-----------|-----------|--------------|------------|-------------------|---------------------|
| FID    | 41.80     | 35.00     | 24.79        | 7.22       | 4.85              | <b>4.32</b>         |

**Table 3.** Comparisons of recall ( $\uparrow$ ) on 3 datasets (StyleGAN-ADA w/o a duel game).

| Methods                  | FFHQ        | CelebA      | CIFAR-10    |
|--------------------------|-------------|-------------|-------------|
| StyleGAN-ADA             | 0.61        | 0.75        | 0.49        |
| StyleGAN-ADA + Dual GAME | <b>0.67</b> | <b>0.83</b> | <b>0.60</b> |

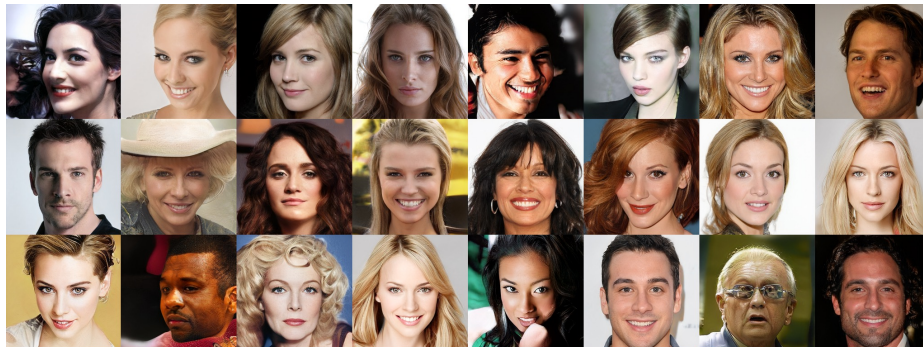**Fig. 4.** Image results generated by proposed DuelGAN. (Trained on CelebA  $256 \times 256$  RGB images. More generated images are deferred to the Appendix C.)

## 6 Conclusion

We propose DuelGAN which introduces a peer discriminator to Vanilla GAN. The role of the peer discriminator is to allow an intermediate game (duel game) between discriminators. Theoretical analysis demonstrates that the introduced duel game incentivizes incremental improvement, addresses vanishing gradients and mode collapse issues, punishes over-agreements among discriminators and is stable with diverged peer discriminator. Experimental results on a synthetic dataset and multiple real world datasets validate that DuelGAN produces high quality images, with lower error than competing techniques.

**Acknowledgements.** JHW and YL are partially supported by the National Science Foundation (NSF) under grants IIS-2007951, IIS-2143895, and CCF-2023495. MHL, JHL, and JD are supported in part by WISEautomotive through a ATC+ Program award from the Korean Ministry of Trade, Industry and Energy (MOTIE).

## References

1. Albuquerque, I., Monteiro, J., Doan, T., Considine, B., Falk, T., Mitliagkas, I.: Multi-objective training of generative adversarial networks with multiple discriminators. arXiv preprint arXiv:1901.08680 (2019) [2](#)
2. Aneja, J., Schwing, A., Kautz, J., Vahdat, A.: A contrastive learning approach for training variational autoencoder priors. *Advances in Neural Information Processing Systems* **34** (2021) [14](#)
3. Antipov, G., Baccouche, M., Dugelay, J.L.: Face aging with conditional generative adversarial networks. In: 2017 IEEE international conference on image processing (ICIP). pp. 2089–2093. IEEE (2017) [1](#)
4. Arbel, M., Sutherland, D., Bińkowski, M., Gretton, A.: On gradient regularizers for mmd gans. In: *Advances in neural information processing systems*. pp. 6700–6710 (2018) [1](#)
5. Arjovsky, M., Chintala, S., Bottou, L.: Wasserstein gan. arXiv preprint arXiv:1701.07875 (2017) [2](#)
6. Brock, A., Donahue, J., Simonyan, K.: Large scale gan training for high fidelity natural image synthesis. arXiv preprint arXiv:1809.11096 (2018) [1](#)
7. Cao, Q., Shen, L., Xie, W., Parkhi, O.M., Zisserman, A.: Vggface2: A dataset for recognising faces across pose and age. In: *International Conference on Automatic Face and Gesture Recognition* (2018) [11](#), [12](#)
8. Chen, X., Duan, Y., Houthooft, R., Schulman, J., Sutskever, I., Abbeel, P.: Infogan: Interpretable representation learning by information maximizing generative adversarial nets. In: *Advances in neural information processing systems*. pp. 2172–2180 (2016) [2](#)
9. Cheng, H., Zhu, Z., Li, X., Gong, Y., Sun, X., Liu, Y.: Learning with instance-dependent label noise: A sample sieve approach. In: *International Conference on Learning Representations* (2021), <https://openreview.net/forum?id=2VXyy9mIyU3> [1](#)
10. Coates, A., Ng, A., Lee, H.: An Analysis of Single Layer Networks in Unsupervised Feature Learning. In: *AISTATS* (2011), [https://cs.stanford.edu/~acoates/papers/coatesleeng\\_aistats\\_2011.pdf](https://cs.stanford.edu/~acoates/papers/coatesleeng_aistats_2011.pdf) [11](#), [12](#)
11. Dash, A., Gamboa, J.C.B., Ahmed, S., Liwicki, M., Afzal, M.Z.: Tac-gan-text conditioned auxiliary classifier generative adversarial network. arXiv preprint arXiv:1703.06412 (2017) [1](#), [5](#)
12. Dieng, A.B., Ruiz, F.J., Blei, D.M., Titsias, M.K.: Prescribed generative adversarial networks. arXiv preprint arXiv:1910.04302 (2019) [1](#), [11](#), [12](#)
13. Durugkar, I., Gemp, I., Mahadevan, S.: Generative multi-adversarial networks. arXiv preprint arXiv:1611.01673 (2016) [2](#)
14. Ghosh, A., Kulharia, V., Nambodiri, V.P., Torr, P.H., Dokania, P.K.: Multi-agent diverse generative adversarial networks. In: *Proceedings of the IEEE conference on computer vision and pattern recognition*. pp. 8513–8521 (2018) [2](#)
15. Gong, X., Chang, S., Jiang, Y., Wang, Z.: Autogan: Neural architecture search for generative adversarial networks. In: *Proceedings of the IEEE International Conference on Computer Vision*. pp. 3224–3234 (2019) [1](#)
16. Goodfellow, I., Pouget-Abadie, J., Mirza, M., Xu, B., Warde-Farley, D., Ozair, S., Courville, A., Bengio, Y.: Generative adversarial nets. In: *Advances in neural information processing systems*. pp. 2672–2680 (2014) [1](#), [3](#), [5](#), [7](#)
17. Grassucci, E., Cicero, E., Comminiello, D.: Quaternion generative adversarial networks. arXiv preprint arXiv:2104.09630 (2021) [11](#), [12](#)

18. Gulrajani, I., Ahmed, F., Arjovsky, M., Dumoulin, V., Courville, A.C.: Improved training of wasserstein gans. In: Advances in neural information processing systems. pp. 5767–5777 (2017) [1](#), [2](#), [11](#), [12](#)
19. Heusel, M., Ramsauer, H., Unterthiner, T., Nessler, B., Hochreiter, S.: Gans trained by a two time-scale update rule converge to a local nash equilibrium. In: Advances in neural information processing systems. pp. 6626–6637 (2017) [11](#)
20. Hoang, Q., Nguyen, T.D., Le, T., Phung, D.: Multi-generator generative adversarial nets. arXiv preprint arXiv:1708.02556 (2017) [2](#)
21. Huang, X., Li, Y., Poursaeed, O., Hopcroft, J., Belongie, S.: Stacked generative adversarial networks. In: Proceedings of the IEEE conference on computer vision and pattern recognition. pp. 5077–5086 (2017) [2](#)
22. Jin, Y., Zhang, J., Li, M., Tian, Y., Zhu, H., Fang, Z.: Towards the automatic anime characters creation with generative adversarial networks. arXiv preprint arXiv:1708.05509 (2017) [1](#)
23. Karras, T., Aila, T., Laine, S., Lehtinen, J.: Progressive growing of gans for improved quality, stability, and variation. arXiv preprint arXiv:1710.10196 (2017) [1](#), [2](#)
24. Karras, T., Aittala, M., Hellsten, J., Laine, S., Lehtinen, J., Aila, T.: Training generative adversarial networks with limited data. Advances in Neural Information Processing Systems **33**, 12104–12114 (2020) [13](#), [14](#), [8](#)
25. Karras, T., Laine, S., Aila, T.: A style-based generator architecture for generative adversarial networks. In: Proceedings of the IEEE/CVF conference on computer vision and pattern recognition. pp. 4401–4410 (2019) [8](#)
26. Kodali, N., Abernethy, J., Hays, J., Kira, Z.: On convergence and stability of gans. arXiv preprint arXiv:1705.07215 (2017) [2](#), [11](#), [12](#)
27. Krizhevsky, A., Hinton, G.: Convolutional deep belief networks on cifar-10. Unpublished manuscript **40**(7), 1–9 (2010) [11](#), [12](#)
28. LeCun, Y., Cortes, C.: MNIST handwritten digit database (2010), <http://yann.lecun.com/exdb/mnist/> [11](#)
29. Ledig, C., Theis, L., Huszár, F., Caballero, J., Cunningham, A., Acosta, A., Aitken, A., Tejani, A., Totz, J., Wang, Z., et al.: Photo-realistic single image super-resolution using a generative adversarial network. In: Proceedings of the IEEE conference on computer vision and pattern recognition. pp. 4681–4690 (2017) [1](#)
30. Li, X., Lin, C., Li, R., Wang, C., Guerin, F.: Latent space factorisation and manipulation via matrix subspace projection. In: International Conference on Machine Learning. pp. 5916–5926. PMLR (2020) [14](#)
31. Li, Y., Liu, S., Yang, J., Yang, M.H.: Generative face completion. In: Proceedings of the IEEE conference on computer vision and pattern recognition. pp. 3911–3919 (2017) [1](#)
32. Lin, Z., Khetan, A., Fanti, G., Oh, S.P.: The power of two samples in generative adversarial networks. arxiv 2017. arXiv preprint arXiv:1712.04086 [8](#)
33. Liu, Y., Guo, H.: Peer loss functions: Learning from noisy labels without knowing noise rates. In: International conference on machine learning. pp. 6226–6236. PMLR (2020) [1](#)
34. Liu, Z., Luo, P., Wang, X., Tang, X.: Large-scale celebfaces attributes (celeba) dataset. Retrieved August **15**(2018), 11 (2018) [11](#), [12](#), [13](#), [8](#)
35. Ma, L., Jia, X., Sun, Q., Schiele, B., Tuytelaars, T., Van Gool, L.: Pose guided person image generation. In: Advances in neural information processing systems. pp. 406–416 (2017) [1](#)
36. Mao, X., Li, Q., Xie, H., Lau, R.Y., Wang, Z., Paul Smolley, S.: Least squares generative adversarial networks. In: Proceedings of the IEEE international conference on computer vision. pp. 2794–2802 (2017) [2](#)

37. Metz, L., Poole, B., Pfau, D., Sohl-Dickstein, J.: Unrolled generative adversarial networks. arXiv preprint arXiv:1611.02163 (2016) [2](#), [10](#)
38. Miyato, T., Kataoka, T., Koyama, M., Yoshida, Y.: Spectral normalization for generative adversarial networks. arXiv preprint arXiv:1802.05957 (2018) [1](#)
39. Mordido, G., Yang, H., Meinel, C.: microbatchgan: Stimulating diversity with multi-adversarial discrimination. In: Proceedings of the IEEE/CVF Winter Conference on Applications of Computer Vision. pp. 3061–3070 (2020) [11](#), [12](#)
40. Nguyen, T., Le, T., Vu, H., Phung, D.: Dual discriminator generative adversarial nets. In: Advances in Neural Information Processing Systems. pp. 2670–2680 (2017) [2](#), [3](#), [5](#), [11](#), [12](#)
41. Nowozin, S., Cseke, B., Tomioka, R.: f-gan: Training generative neural samplers using variational divergence minimization. In: Advances in neural information processing systems. pp. 271–279 (2016) [2](#)
42. Pathak, D., Krahenbuhl, P., Donahue, J., Darrell, T., Efros, A.A.: Context encoders: Feature learning by inpainting. In: Proceedings of the IEEE conference on computer vision and pattern recognition. pp. 2536–2544 (2016) [1](#)
43. Perarnau, G., Van De Weijer, J., Raducanu, B., Álvarez, J.M.: Invertible conditional gans for image editing. arXiv preprint arXiv:1611.06355 (2016) [1](#)
44. Qi, G.J.: Loss-sensitive generative adversarial networks on lipschitz densities. International Journal of Computer Vision **128**(5), 1118–1140 (2020) [2](#), [11](#), [12](#)
45. Radford, A., Metz, L., Chintala, S.: Unsupervised representation learning with deep convolutional generative adversarial networks. arXiv preprint arXiv:1511.06434 (2015) [2](#), [11](#), [12](#), [13](#), [7](#), [8](#)
46. Salimans, T., Goodfellow, I., Zaremba, W., Cheung, V., Radford, A., Chen, X.: Improved techniques for training gans. arXiv preprint arXiv:1606.03498 (2016) [11](#)
47. Song, Y., Ermon, S.: Generative modeling by estimating gradients of the data distribution. In: Advances in Neural Information Processing Systems. pp. 11918–11930 (2019) [1](#)
48. Taigman, Y., Polyak, A., Wolf, L.: Unsupervised cross-domain image generation. arXiv preprint arXiv:1611.02200 (2016) [1](#)
49. Tran, N.T., Bui, T.A., Cheung, N.M.: Dist-gan: An improved gan using distance constraints. In: Proceedings of the European Conference on Computer Vision (ECCV). pp. 370–385 (2018) [1](#)
50. Tran, N.T., Bui, T.A., Cheung, N.M.: Dist-gan: An improved gan using distance constraints. In: Proceedings of the European Conference on Computer Vision (ECCV). pp. 370–385 (2018) [11](#), [12](#)
51. Tran, N.T., Tran, V.H., Nguyen, B.N., Yang, L., Cheung, N.M.M.: Self-supervised gan: Analysis and improvement with multi-class minimax game. Advances in Neural Information Processing Systems **32**, 13253–13264 (2019) [1](#)
52. Vahdat, A., Kreis, K., Kautz, J.: Score-based generative modeling in latent space. Advances in Neural Information Processing Systems **34** (2021) [14](#)
53. Vondrick, C., Pirsiavash, H., Torralba, A.: Generating videos with scene dynamics. In: Advances in neural information processing systems. pp. 613–621 (2016) [1](#)
54. Wang, T.C., Liu, M.Y., Zhu, J.Y., Tao, A., Kautz, J., Catanzaro, B.: High-resolution image synthesis and semantic manipulation with conditional gans. In: Proceedings of the IEEE conference on computer vision and pattern recognition. pp. 8798–8807 (2018) [1](#)
55. Wei, J., Liu, H., Liu, T., Niu, G., Liu, Y.: Understanding generalized label smoothing when learning with noisy labels. arXiv preprint arXiv:2106.04149 (2021) [1](#)
56. Wei, J., Liu, Y.: When optimizing  $f$ -divergence is robust with label noise. arXiv preprint arXiv:2011.03687 (2020) [1](#)

57. Wiatrak, M., Albrecht, S.V., Nystrom, A.: Stabilizing generative adversarial networks: A survey. arXiv preprint arXiv:1910.00927 (2019) [2](#)
58. Wu, H., Zheng, S., Zhang, J., Huang, K.: Gp-gan: Towards realistic high-resolution image blending. In: Proceedings of the 27th ACM International Conference on Multimedia. pp. 2487–2495 (2019) [1](#)
59. Xiao, H., Rasul, K., Vollgraf, R.: Fashion-mnist: a novel image dataset for benchmarking machine learning algorithms. arXiv preprint arXiv:1708.07747 (2017) [11](#)
60. Xiao, Z., Yan, Q., Amit, Y.: Generative latent flow. arXiv preprint arXiv:1905.10485 (2019) [14](#)
61. Yeh, R.A., Chen, C., Yian Lim, T., Schwing, A.G., Hasegawa-Johnson, M., Do, M.N.: Semantic image inpainting with deep generative models. In: Proceedings of the IEEE conference on computer vision and pattern recognition. pp. 5485–5493 (2017) [1](#)
62. Zhang, H., Xu, T., Li, H., Zhang, S., Wang, X., Huang, X., Metaxas, D.N.: Stackgan: Text to photo-realistic image synthesis with stacked generative adversarial networks. In: Proceedings of the IEEE international conference on computer vision. pp. 5907–5915 (2017) [1](#)
63. Zhang, H., Zhang, Z., Odena, A., Lee, H.: Consistency regularization for generative adversarial networks. arXiv preprint arXiv:1910.12027 (2019) [1](#)
64. Zhu, J.Y., Park, T., Isola, P., Efros, A.A.: Unpaired image-to-image translation using cycle-consistent adversarial networks. In: Proceedings of the IEEE international conference on computer vision. pp. 2223–2232 (2017) [1](#)

## Appendix

The appendix is organized as follows:

- Section A gives the detailed algorithm of DuelGAN.
- Section B includes the omitted proofs for all theoretical conclusions in the main paper.
- Section C includes experiment details and additional experiment results.

### A The DuelGAN Algorithm

Our introduced duel game between two discriminators is inspired by peer prediction mechanism which has shown successful applications in designing robust loss functions [33,56,9,55]. To give a more detailed and practical implementation of the duel game, we summarize the overall DuelGAN algorithm in Algorithm 1. In experiments, we train  $G$  to minimize  $\log(1 - D_i(G(z)))$  which is equivalent to maximizing  $\log D_i(G(z))$ .

---

#### Algorithm 1 DuelGAN

---

- 1: **Input:** two discriminators  $D_1, D_2$ , generator  $G$ , training samples  $\{x_i\}_{i=1}^n$ , weights  $\alpha, \beta$ .
- 2: **For** number of training iterations **do**
- For** 1 to  $k$  steps **do**

- Sample mini-batch of  $m$  noise samples  $Z = \{z_1, \dots, z_m\}$  from noise prior  $p_z$ .
- Sample mini-batch of  $m$  samples  $X = \{x_1, \dots, x_m\}$  from data generating distribution  $p_{\text{data}}(x)$ .
- Combine two subsets  $T := X \cup Z$ , and denote by  $T = \{t_1, \dots, t_{2m}\}$ .
- Update discriminator  $D_i (i \in \{1, 2\})$  by ascending the stochastic gradient:

$$\begin{aligned} & \nabla_{\theta_{d_i}} \frac{1}{m} \sum_{i=1}^m \left[ \log D_i(x_i) + \log \left( 1 - D_i(G(z_i)) \right) \right] \\ & + \frac{\beta}{2m} \sum_{j=1}^{2m} \left[ -\ell_{\text{CE}} \left( D_i(t_j), \mathbb{1} \left( D_j(t_j) > \frac{1}{2} \right) \right) + \alpha \cdot \ell_{\text{CE}} \left( D_i(t_{p_1}), \mathbb{1} \left( D_j(t_{p_2}) > \frac{1}{2} \right) \right) \right], \end{aligned} \quad (16)$$

- where  $t_{p_1}, t_{p_2}$  are randomly selected (with replacement) samples from  $T$ .
- Update  $G$  by descending its stochastic gradient:

$$\nabla_{\theta_g} \frac{1}{m} \sum_{i=1}^m \left[ \log \left( 1 - D_1(G(z_i)) \right) + \log \left( 1 - D_2(G(z_i)) \right) \right]. \quad (17)$$


---

## B Omitted Proofs

### B.1 Proof of Proposition 1

We firstly introduce Lemma 1 which helps with the proof of Proposition 1.

**Lemma 1.** *For any  $(a, b) \in \mathbb{R}^2 \setminus \{0, 0\}$ , the function  $y \rightarrow a \log(y) + b \log(1 - y)$  achieves its maximum in  $[0, 1]$  at  $\frac{a}{a+b}$ .*

*Proof.* Denote by  $f(y) := a \log(y) + b \log(1 - y)$ , clearly, when  $y = 0$  or  $y = 1$ ,  $f(y) = -\infty$ . For  $y \in (0, 1)$ , we have:

$$f'(y) = 0 \iff \frac{a}{y} - \frac{b}{1-y} = 0 \iff y = \frac{a}{a+b}. \quad (18)$$

Note that  $f'(y) > 0$  if  $0 < y < \frac{a}{a+b}$  and  $f'(y) < 0$  if  $1 > y > \frac{a}{a+b}$ . Thus, the maximum of  $f(y)$  should be  $\max(f(a), f(\frac{a}{a+b}), f(b)) = f(\frac{a}{a+b})$ . And  $f(y)$  achieves its maximum in  $[0, 1]$  at  $\frac{a}{a+b}$ .

Now we proceed to prove Proposition 1.

#### **Proof of Proposition 1**

*Proof.* The trainer criterion for the discriminator  $D_i$ , given any generator  $G$ , is to maximize the quantity  $\mathcal{L}(D_1, D_2, G)$ . Remember that:

$$\begin{aligned} \mathcal{L}(D_1, D_2, G) &= \mathbb{E}_{x \sim p_{\text{data}}} [\log D_1(x)] + \mathbb{E}_{x \sim p_{\text{data}}} [\log D_2(x)] \\ &\quad + \mathbb{E}_{z \sim p_z} [\log (1 - D_1(G(z)))] + \mathbb{E}_{z \sim p_z} [\log (1 - D_2(G(z)))] \\ &\quad + \beta \cdot \mathbb{E}_{x \sim p_{\text{duel}}} \left[ \ell \left( D_1(x), \mathbb{1} \left( D_2(x) > \frac{1}{2} \right) \right) - \alpha \cdot \ell \left( D_1(x_{p_1}), \mathbb{1} \left( D_2(x_{p_2}) > \frac{1}{2} \right) \right) \right] \\ &\quad + \beta \cdot \mathbb{E}_{x \sim p_{\text{duel}}} \left[ \ell \left( D_2(x), \mathbb{1} \left( D_1(x) > \frac{1}{2} \right) \right) - \alpha \cdot \ell \left( D_2(x_{p_1}), \mathbb{1} \left( D_1(x_{p_2}) > \frac{1}{2} \right) \right) \right]. \end{aligned} \quad (19)$$



We then have:

$$\begin{aligned}
\text{Eqn. (19)} &= \int_x p_{\text{data}}(x) [\log(D_1(x)) + \log(D_2(x))] dx \\
&+ \int_z p_z(z) [\log(1 - D_1(G(z))) + \log(1 - D_2(G(z)))] dz \\
&+ \beta \cdot \int_x p_{\text{duel}}(x) (r_{2,G}(x) - \alpha \cdot p_{2,G}) \cdot \log(D_1(x)) dx \\
&+ \beta \cdot \int_x p_{\text{duel}}(x) (r_{1,G}(x) - \alpha \cdot p_{1,G}) \cdot \log(D_2(x)) dx \\
&+ \beta \cdot \int_x p_{\text{duel}}(x) (1 - \alpha - r_{2,G}(x) + \alpha \cdot p_{2,G}) \cdot \log(1 - D_1(x)) dx \\
&+ \beta \cdot \int_x p_{\text{duel}}(x) (1 - \alpha - r_{1,G}(x) + \alpha \cdot p_{1,G}) \cdot \log(1 - D_2(x)) dx \\
&= \int_x p_{\text{data}}(x) [\log(D_1(x)) + \log(D_2(x))] dx \\
&+ \int_x p_g(x) [\log(1 - D_1(x)) + \log(1 - D_2(x))] dx \\
&+ \beta \cdot \int_x p_{\text{duel}}(x) (r_{2,G}(x) - \alpha \cdot p_{2,G}) \cdot \log(D_1(x)) dx \\
&+ \beta \cdot \int_x p_{\text{duel}}(x) (r_{1,G}(x) - \alpha \cdot p_{1,G}) \cdot \log(D_2(x)) dx \\
&+ \beta \cdot \int_x p_{\text{duel}}(x) (1 - \alpha - r_{2,G}(x) + \alpha \cdot p_{2,G}) \cdot \log(1 - D_1(x)) dx \\
&+ \beta \cdot \int_x p_{\text{duel}}(x) (1 - \alpha - r_{1,G}(x) + \alpha \cdot p_{1,G}) \cdot \log(1 - D_2(x)) dx \\
&= \int_x [p_{\text{data}}(x) + \beta \cdot (r_{2,G}(x) - \alpha \cdot p_{2,G}) \cdot p_{\text{duel}}(x)] \cdot \log(D_1(x)) dx \\
&+ \int_x [p_g(x) + \beta \cdot (1 - \alpha - r_{2,G}(x) + \alpha \cdot p_{2,G}) \cdot p_{\text{duel}}(x)] \cdot \log(1 - D_1(x)) dx \\
&+ \int_x [p_{\text{data}}(x) + \beta \cdot (r_{1,G}(x) - \alpha \cdot p_{1,G}) \cdot p_{\text{duel}}(x)] \cdot \log(D_2(x)) dx \\
&+ \int_x [p_g(x) + \beta \cdot (1 - \alpha - r_{1,G}(x) + \alpha \cdot p_{1,G}) \cdot p_{\text{duel}}(x)] \cdot \log(1 - D_2(x)) dx.
\end{aligned} \tag{20}$$

For  $D_1, D_2$ , according to Lemma 1, the above objective function respectively achieves its maximum in  $[0, 1], [0, 1]$  at:

$$D_{i,G}^*(x) = \frac{p_{\text{data}}(x) + \beta \cdot (r_{j,G}(x) - \alpha \cdot p_{j,G}) \cdot p_{\text{duel}}(x)}{p_{\text{data}}(x) + p_g(x) + \beta \cdot (1 - \alpha) \cdot p_{\text{duel}}(x)}, \quad i \neq j. \tag{21}$$

With the introduce of Duel Game, the distributions  $p_{\text{data}}$  and  $p_g$  in the Vanilla GAN got changed due to the appearance of  $p_{\text{duel}}$ . Thus, we define the corresponding updated distributions in DuelGAN w.r.t. discriminator  $D_i$  as  $p_{\text{data}_i}$  and  $p_{g_i}$ ,

respectively:

$$p_{\text{data}_i}(x) := \frac{p_{\text{data}}(x) + \beta \cdot \hat{r}_{j,G}^*(x) \cdot p_{\text{duel}}(x)}{\int_x p_{\text{data}}(x) + \beta \cdot \hat{r}_{j,G}^*(x) \cdot p_{\text{duel}}(x) dx}, \quad (22)$$

$$p_{g_i}(x) := \frac{p_g(x) + \beta \cdot (1 - \hat{r}_{j,G}^*(x)) \cdot p_{\text{duel}}(x)}{\int_x p_g(x) + \beta \cdot (1 - \hat{r}_{j,G}^*(x)) \cdot p_{\text{duel}}(x) dx}. \quad (23)$$

## B.2 Proof of Theorem 1

*Proof.* When  $\alpha = 0$ ,  $r_{j,G}(x) = 1/2$ , for  $\alpha = 0, i = 1, 2$ , we have:

$$D_{i,G}^*(x) = \frac{p_{\text{data}}(x) + \beta \cdot \hat{r}_{j,G}^*(x) \cdot p_{\text{duel}}(x)}{p_{\text{data}}(x) + p_g(x) + \beta \cdot p_{\text{duel}}(x)} \rightarrow \frac{p_{\text{data}}(x) + \frac{\beta}{2} \cdot p_{\text{duel}}(x)}{p_{\text{data}}(x) + p_g(x) + \beta \cdot p_{\text{duel}}(x)}. \quad (24)$$

This allows us to rewrite  $C(G)/2$  as:

$$\begin{aligned} \frac{C(G)}{2} = & \mathbb{E}_{x \sim p_{\text{data}_i}} \left[ \log \frac{p_{\text{data}}(x) + \frac{\beta}{2} \cdot p_{\text{duel}}(x)}{p_{\text{data}}(x) + p_g(x) + \beta \cdot p_{\text{duel}}(x)} \right] \\ & + \mathbb{E}_{x \sim p_{g_i}} \left[ \log \frac{p_g(x) + \frac{\beta}{2} \cdot p_{\text{duel}}(x)}{p_{\text{data}}(x) + p_g(x) + \beta \cdot p_{\text{duel}}(x)} \right]. \end{aligned} \quad (25)$$

$\Rightarrow$  Note that  $2 \cdot (\mathbb{E}_{x \sim p_{\text{data}_i}} [-\log 2] + \mathbb{E}_{x \sim p_{g_i}} [-\log 2]) = -\log 16$ , by subtracting this expression from  $C(G)$ , we have:

$$\begin{aligned} C(G) = & -\log 16 + 2 \cdot KL \left( p_g + \frac{\beta}{2} \cdot p_{\text{duel}} \left\| \frac{p_{\text{data}} + p_g + \beta \cdot p_{\text{duel}}}{2} \right\| \right) \\ & + 2 \cdot KL \left( p_{\text{data}} + \frac{\beta}{2} \cdot p_{\text{duel}} \left\| \frac{p_{\text{data}} + p_g + \beta \cdot p_{\text{duel}}}{2} \right\| \right), \end{aligned} \quad (26)$$

where KL is the Kullback-Leibler divergence. Note that:

$$C(G) = -\log 16 + 2 \cdot JSD \left( p_{\text{data}} + \frac{\beta}{2} \cdot p_{\text{duel}} \left\| p_g + \frac{\beta}{2} \cdot p_{\text{duel}} \right\| \right), \quad (27)$$

and the Jensen-Shannon divergence between two distributions is always non-negative and zero only when they are equal, we have shown that  $C(G)^* = -\log 16$  is the global minimum of  $C(G)$ . Thus, we need

$$p_{\text{data}} + \frac{\beta}{2} \cdot p_{\text{duel}} = p_g + \frac{\beta}{2} \cdot p_{\text{duel}} \Leftrightarrow p_{\text{data}} = p_g.$$

$\Leftarrow$  Given that  $p_{\text{data}} = p_g$ , we have:

$$\begin{aligned}
C(G) &= \max_D \mathcal{L}(G, D_1, D_2) \\
&= 2 \cdot \mathbb{E}_{x \sim p_{\text{data}_i}} \left[ \log \frac{p_{\text{data}}(x) + \frac{\beta}{2} \cdot p_{\text{duel}}(x)}{p_{\text{data}}(x) + p_g(x) + \beta \cdot p_{\text{duel}}(x)} \right] \\
&\quad + 2 \cdot \mathbb{E}_{x \sim p_{g_i}} \left[ \log \frac{p_g(x) + \frac{\beta}{2} \cdot p_{\text{duel}}(x)}{p_{\text{data}}(x) + p_g(x) + \beta \cdot p_{\text{duel}}(x)} \right] \\
&= 2 \cdot \left( \log \frac{1}{2} + \log \frac{1}{2} \right) = -\log 16.
\end{aligned} \tag{28}$$

### B.3 Proof of Theorem 4

*Proof.* Since for the Vanilla GAN, there exists a set  $S$  in the instance domain  $\mathcal{X}$  such that  $p_{\text{data}}(S) \geq \delta$ ,  $p_g(S) \leq \epsilon$ . For the set  $S$  given by the  $(\epsilon, \delta)$ -mode collapse of Vanilla GAN, we have:

$$1 \geq \mathbb{E}_{x \in S} [p_{\text{data}}(x)] \geq \delta, \quad 0 \leq \mathbb{E}_{x \in S} [p_g(x)] \leq \epsilon.$$

For either discriminator  $D_i$  in the DuelGAN, we have:

$$\begin{aligned}
p_{\text{data}_i}(x) &:= \frac{p_{\text{data}}(x) + \beta \cdot \hat{r}_{j,G}^*(x) \cdot p_{\text{duel}}(x)}{\int_x p_{\text{data}}(x) + \beta \cdot \hat{r}_{j,G}^*(x) \cdot p_{\text{duel}}(x) dx}, \\
p_{g_i}(x) &:= \frac{p_g(x) + \beta \cdot (1 - \hat{r}_{j,G}^*(x)) \cdot p_{\text{duel}}(x)}{\int_x p_g(x) + \beta \cdot (1 - \hat{r}_{j,G}^*(x)) \cdot p_{\text{duel}}(x) dx}.
\end{aligned}$$

We then have:

$$\begin{aligned}
\mathbb{E}_{x \in S} [p_{\text{data}_i}(x)] &= \mathbb{E}_{x \in S} [c_{i,1}(x) \cdot p_{\text{data}}(x)] + \mathbb{E}_{x \in S} [(1 - c_{i,1}(x)) \cdot p_g(x)] \\
&= \mathbb{E}_{x \in S} [c_{i,1}(x)] \cdot \mathbb{E}_{x \in S} [p_{\text{data}}(x)] + \text{Cov}(c_{i,1}, p_{\text{data}}) \\
&\quad + \mathbb{E}_{x \in S} [(1 - c_{i,1}(x))] \cdot \mathbb{E}_{x \in S} [p_g(x)] - \text{Cov}(c_{i,1}, p_g) \\
&= \mathbb{E}_{x \in S} [c_{i,1}(x)] \cdot \mathbb{E}_{x \in S} [p_{\text{data}}(x)] + \mathbb{E}_{x \in S} [(1 - c_{i,1}(x))] \cdot \mathbb{E}_{x \in S} [p_g(x)] + \text{Cov}(c_{i,1}, p_{\text{data}} - p_g) \\
&> \mathbb{E}_{x \in S} [c_{i,1}(x)] \cdot \delta + \mathbb{E}_{x \in S} [(1 - c_{i,1}(x))] \cdot \mathbb{E}_{x \in S} [p_g(x)] + \text{Cov}(c_{i,1}, p_{\text{data}} - p_g).
\end{aligned}$$

And:

$$\begin{aligned}
\mathbb{E}_{x \in S} [p_{g_i}(x)] &= \mathbb{E}_{x \in S} [c_{i,2}(x) \cdot p_g(x)] + \mathbb{E}_{x \in S} [(1 - c_{i,2}(x)) \cdot p_{\text{data}}(x)] \\
&= \mathbb{E}_{x \in S} [c_{i,2}(x)] \cdot \mathbb{E}_{x \in S} [p_g(x)] + \mathbb{E}_{x \in S} [(1 - c_{i,2}(x))] \cdot \mathbb{E}_{x \in S} [p_{\text{data}}(x)] + \text{Cov}(c_{i,2}, p_g - p_{\text{data}}) \\
&< \mathbb{E}_{x \in S} [c_{i,2}(x)] \cdot \epsilon + \mathbb{E}_{x \in S} [(1 - c_{i,2}(x))] \cdot \mathbb{E}_{x \in S} [p_{\text{data}}(x)] + \text{Cov}(c_{i,2}, p_g - p_{\text{data}}).
\end{aligned}$$

### B.4 Proof of Theorem 3

*Proof.* Ignoring the weight  $\beta$ , the duel term of discriminator  $D_i$  w.r.t. its diverged peer discriminator  $\tilde{D}_j$  becomes:

$$\begin{aligned}
\text{Duel}(D_i)|_{\tilde{D}_j} &:= \mathbb{E}_{x \sim p_{\text{duel}}} \left[ \ell \left( D_i(x), \mathbb{1}(\tilde{D}_j(x) > \frac{1}{2}) \right) - \alpha \cdot \ell \left( D_i(x_{p_1}), \mathbb{1}(\tilde{D}_j(x_{p_2}) > \frac{1}{2}) \right) \right] \\
&= \mathbb{E}_{x \sim p_{\text{duel}}, Y_j^* = 1} \left[ \mathbb{P}(\tilde{Y}_j = 1 | Y_j^* = 1) \cdot \ell(D_i(x), 1) + \mathbb{P}(\tilde{Y}_j = 0 | Y_j^* = 1) \cdot \ell(D_i(x), 0) \right] \\
&+ \mathbb{E}_{x \sim p_{\text{duel}}, Y_j^* = 0} \left[ \mathbb{P}(\tilde{Y}_j = 1 | Y_j^* = 0) \cdot \ell(D_i(x), 1) + \mathbb{P}(\tilde{Y}_j = 0 | Y_j^* = 0) \cdot \ell(D_i(x), 0) \right] \\
&- \alpha \cdot \mathbb{E}_{x_{p_1} \sim p_{\text{duel}}} \left[ \mathbb{P}(\tilde{Y}_j = 1) \cdot \ell(D_i(x_{p_1}), 1) + \mathbb{P}(\tilde{Y}_j = 0) \cdot \ell(D_i(x_{p_1}), 0) \right] \\
&= \mathbb{E}_{x \sim p_{\text{duel}}, Y_j^* = 1} \left[ (1 - e_{\text{data},j}) \cdot \ell(D_i(x), 1) + e_{\text{data},j} \cdot \ell(D_i(x), 0) \right] \\
&+ \mathbb{E}_{x \sim p_{\text{duel}}, Y_j^* = 0} \left[ e_{g,j} \cdot \ell(D_i(x), 1) + (1 - e_{g,j}) \cdot \ell(D_i(x), 0) \right] \\
&- \alpha \cdot \mathbb{E}_{x_{p_1} \sim p_{\text{duel}}} \left[ [\mathbb{P}(Y_j^* = 1) \cdot (1 - e_{\text{data},j}) + \mathbb{P}(Y_j^* = 0) \cdot e_{g,j}] \cdot \ell(D_i(x_{p_1}), 1) \right] \\
&- \alpha \cdot \mathbb{E}_{x_{p_1} \sim p_{\text{duel}}} \left[ [\mathbb{P}(Y_j^* = 1) \cdot e_{\text{data},j} + \mathbb{P}(Y_j^* = 0) \cdot (1 - e_{g,j})] \cdot \ell(D_i(x_{p_1}), 0) \right] \\
&= \mathbb{E}_{x \sim p_{\text{duel}}, Y_j^* = 1} \left[ (1 - e_{\text{data},j} - e_{g,j}) \cdot \ell(D_i(x), 1) + e_{\text{data},j} \cdot \ell(D_i(x), 0) + e_{g,j} \cdot \ell(D_i(x), 1) \right] \\
&+ \mathbb{E}_{x \sim p_{\text{duel}}, Y_j^* = 0} \left[ (1 - e_{\text{data},j} - e_{g,j}) \cdot \ell(D_i(x), 0) + e_{\text{data},j} \cdot \ell(D_i(x), 0) + e_{g,j} \cdot \ell(D_i(x), 1) \right] \\
&- \alpha \cdot \mathbb{E}_{x_{p_1} \sim p_{\text{duel}}} \left[ c_1 \cdot \ell(D_i(x_{p_1}), 1) \right] - \alpha \cdot \mathbb{E}_{x_{p_1} \sim p_{\text{duel}}} \left[ c_2 \cdot \ell(D_i(x_{p_1}), 0) \right],
\end{aligned}$$

where we define:

$$\begin{aligned}
c_1 &:= \mathbb{P}(Y_j^* = 1) \cdot (1 - e_{\text{data},j} - e_{g,j}) + \mathbb{P}(Y_j^* = 0) \cdot e_{g,j} + \mathbb{P}(Y_j^* = 1) \cdot e_{g,j}, \\
c_2 &:= \mathbb{P}(Y_j^* = 0) \cdot (1 - e_{\text{data},j} - e_{g,j}) + \mathbb{P}(Y_j^* = 1) \cdot e_{\text{data},j} + \mathbb{P}(Y_j^* = 0) \cdot e_{\text{data},j},
\end{aligned}$$

for a clear presentation. Proceeding the previous deduction, we then have:

$$\begin{aligned}
\text{Duel}(D_i)|_{\tilde{D}_j} &= (1 - e_{\text{data},j} - e_{g,j}) \cdot \mathbb{E}_{x \sim p_{\text{duel}}} \left[ \ell(D_i(x), Y_j^*) \right] \\
&+ \mathbb{E}_{x \sim p_{\text{duel}}} \left[ e_{\text{data},j} \cdot \ell(D_i(x), 0) + e_{g,j} \cdot \ell(D_i(x), 1) \right] \\
&- \alpha \cdot (1 - e_{\text{data},j} - e_{g,j}) \cdot \mathbb{E}_{x \sim p_{\text{duel}}} \left[ \ell(D_i(x_{p_1}), Y_j^*) \right] \\
&- \alpha \cdot \mathbb{E}_{x \sim p_{\text{duel}}} \left[ e_{\text{data},j} \cdot \ell(D_i(x), 0) + e_{g,j} \cdot \ell(D_i(x), 1) \right]. \quad (29)
\end{aligned}$$

Thus,

$$\begin{aligned}
\text{Duel}(D_i)|_{\tilde{D}_j} &= (1 - e_{\text{data},j} - e_{g,j}) \cdot \text{Duel}(D_i)|_{D_{j,G}^*} \\
&+ \underbrace{(1 - \alpha) \cdot \mathbb{E}_{x \sim p_{\text{duel}}} [e_{\text{data},j} \cdot \ell(D_i(x), 0) + e_{g,j} \cdot \ell(D_i(x), 1)]}_{\text{Bias}}. \quad (30)
\end{aligned}$$

Note that:

$$\text{Bias} = (1 - \alpha) \cdot \mathbb{E}_{x \sim p_{\text{duel}}} [e_{\text{data},j} \cdot \log(1 - D_i(x)) + e_{g,j} \cdot \log(D_i(x))]. \quad (31)$$

Thus, given  $\alpha = 1$ , the **Bias** term is cancelled out. When  $e_{\text{data},j} + e_{g,j} < 1$ , we have:

$$\text{Duel}(D_i)|_{\tilde{D}_j} = (1 - e_{\text{data},j} - e_{g,j}) \cdot \text{Duel}(D_i)|_{D_{j,G}^*}, \quad (32)$$

and we further have:

$$\max_{D_i} \text{Duel}(D_i)|_{\tilde{D}_j} = \max_{D_i} \text{Duel}(D_i)|_{D_{j,G}^*}. \quad (33)$$

### B.5 Proof of Theorem 4

*Proof.* When  $\beta = 0$ , the overall min-max game becomes:

$$\begin{aligned} & \min_G \max_{D_1, D_2} \mathcal{L}(D_1, D_2, G) \\ &= \min_G \max_{D_1, D_2} \mathbb{E}_{x \sim p_{\text{data}}} [\log D_1(x)] + \mathbb{E}_{z \sim p_z} \left[ \log \left( 1 - D_1(G(z)) \right) \right] \\ & \quad + \mathbb{E}_{x \sim p_{\text{data}}} [\log D_2(x)] + \mathbb{E}_{z \sim p_z} \left[ \log \left( 1 - D_2(G(z)) \right) \right]. \end{aligned} \quad (34)$$

Since we assume enough capacity, the inner max game is achieved if and only if:  $D_1(x) = D_2(x) = \frac{p_{\text{data}}(x)}{p_{\text{data}}(x) + p_g(x)}$ . To prove  $p_g$  converges to  $p_{\text{data}}$ , only need to reproduce the proof of proposition 2 in [16]. We omit the details here.

## C Experiment Details and Additional Results

**Model Architectures** For the small-scale datasets, we used a shallow version of generator and discriminator: three convolution layers in the generator and four layers in the discriminators. We use a deep version of generator and discriminator for natural scene and human face image generation, which have three convolution layers in the generator and seven layers in the discriminators. The deep version is the original design of DCGAN[45]. The peer discriminator uses the duplicate version of the first one.

### C.1 Architecture Comparison Between GAN, D2GAN and DuelGAN

Figure 5 shows the architecture designs of single discriminator, dual discriminator, and our proposed DuelGAN. Compared with Vanilla GAN, DuelGAN has one more identical discriminator and a competitive Duel Game between two discriminators. The introduced Duel Game induces diversified generated samples by discouraging the agreement between  $D_1$  and  $D_2$ . In D2GAN, although both discriminators are trained with different loss functions, they do not interfere with each other in the training.

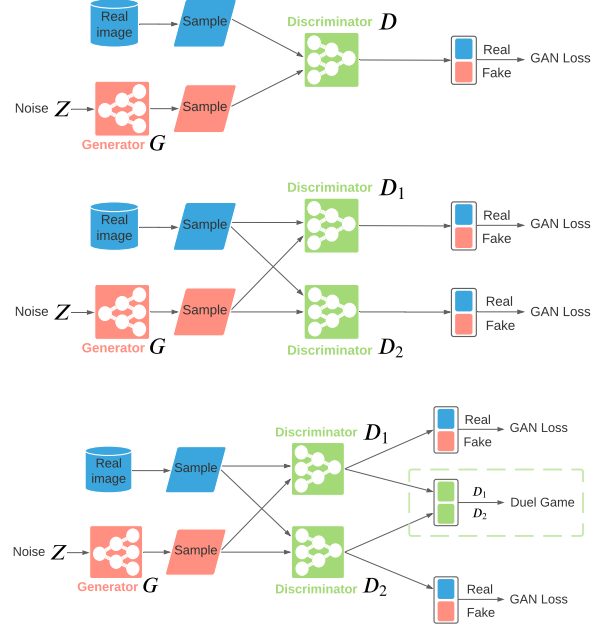

**Fig. 5.** Architecture comparisons between GAN based method (first row), dual discriminators GAN based method (second row) and DuelGAN (third row).

## C.2 Additional Experiment Results

StyleGAN-ADA [24] is the state-of-the-art method in image generation. We applied our duel game to StyleGAN-ADA and further improves its performance. On CelebA [34] dataset, we improved FID from 4.85 to 4.52, and FFHQ-10k[25] dataset improved FID from 7.24 to 6.01. We show the generated image results (trained on CelebA) in Figure 6.

## C.3 Additional Experiment Details

**Model Architectures** For the small-scale datasets, we used a shallow version of generator and discriminator: three convolution layers in the generator and four layers in the discriminators. We use a deep version of generator and discriminator for natural scene and human face image generation, which have three convolution layers in the generator and seven layers in the discriminators. The deep version is the original design of DCGAN[45]. The peer discriminator uses the duplicate version of the first one.

**Hyper-Parameters.** DuelGAN achieves low FID scores when  $\alpha$  and  $\beta$  are simply set to constant values. However we found that we could obtain an approximately 10% improvement through dynamic tuning. The parameter  $\beta$  controls the

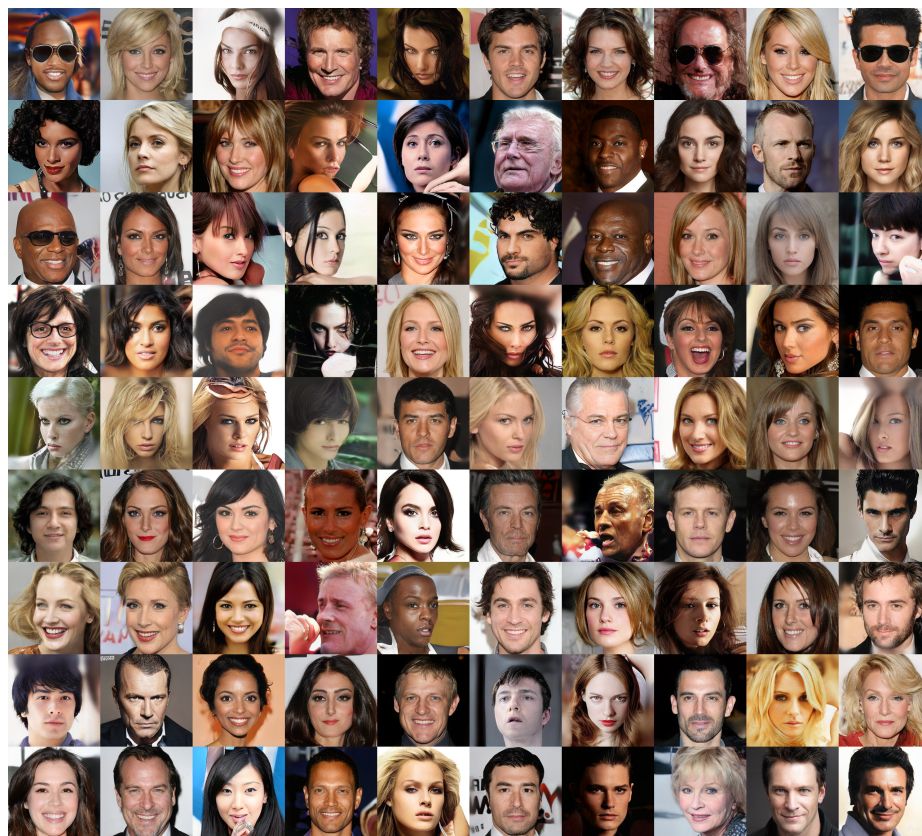

**Fig. 6.** More CelebA image generation results of applying duel game on StyleGAN-ADA.

overall weight of Duel-D, while  $\alpha$  punishes the condition when  $D_1$  over-agrees with  $D_2$ . In the early training phase when we have an unstable generator and discriminator, we set  $\alpha$  and  $\beta$  to 0. As training progresses, we gradually increase these parameters to a max value, which helps with vanishing gradients. After the midpoint of training we decrease these parameters to help the discriminators converge, until the parameters reach approximately 0 at the end of the training process. We adopt 0.3, 0.5 as the max value for  $\alpha$  and  $\beta$ , respectively.

#### C.4 Ablation Study of DuelGAN

During training, We initialize the  $\alpha$  and  $\beta$  as 0, and gradually increase to the set maximum value. We experimentally discover  $\alpha=0.3$  and  $\beta=0.5$  can achieve the best FID score in the datasets we tested on. Table 3 shows an thorough ablation of different hyper-parameter setting on STL-10 dataset. The bold text are the best  $\alpha$  setting when beta is fixed.

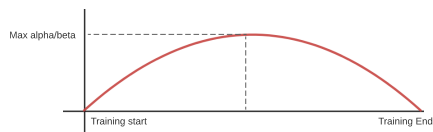

**Fig. 7.** The trend of  $\alpha, \beta$  in the training.

|              | $\alpha=0.1$ | $\alpha=0.3$ | $\alpha=0.5$ | $\alpha=0.7$ | $\alpha=0.9$ |
|--------------|--------------|--------------|--------------|--------------|--------------|
| $\beta=0.25$ | 60.88        | 56.01        | <b>51.86</b> | 58.17        | 60.91        |
| $\beta=0.50$ | 58.77        | <b>51.37</b> | 58.45        | 55.16        | 57.75        |
| $\beta=0.75$ | <b>55.07</b> | 59.58        | 58.58        | 58.22        | 57.75        |

**Table 4.** Ablation study of max  $\alpha$  and max  $\beta$  value tuning on STL-10 dataset (evaluate with FID score).

#### C.5 Stability of Training

Now we empirically show the stability of DuelGAN training procedure. We adopt STL-10 dataset and  $\beta = 0.25$  for illustration. In Figure 8 and 9, we visualize the loss of two discriminators during the training procedure of STL-10 dataset. The red lines indicate the smoothed trend of the loss evaluated on the generated images and real images. Real losses are represented by the shaded red lines. Although there exists certain unstable episodes (the difference between smoothed loss and the real loss is large) for both discriminators, the overall trend of both



discriminators are stable. What is more, we do observe that  $D_1$  and  $D_2$  hardly experience unstable episodes at the same time. This phenomenon further validates our conclusion in Theorem 2: an unstable/diverged discriminator hardly disrupts the training of its peer discriminator!

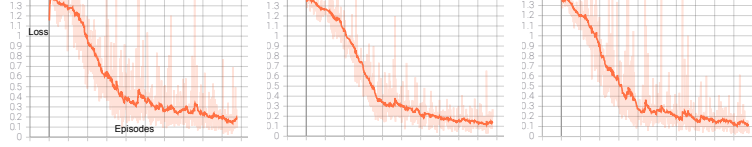

**Fig. 8.** The loss of  $D_1$  in DuelGAN with  $\beta = 0.25$  on STL-10 dataset, left:  $\alpha = 0.3$ ; middle: 0.5; right:  $\alpha = 0.7$ .

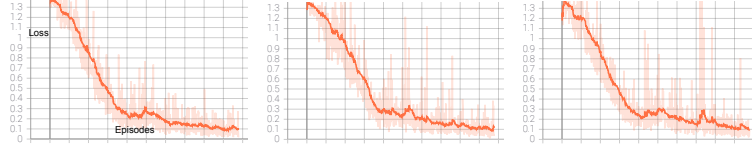

**Fig. 9.** The loss of  $D_2$  in DuelGAN with  $\beta = 0.25$  on STL-10 dataset, left:  $\alpha = 0.3$ ; middle: 0.5; right:  $\alpha = 0.7$ .

**Agreements Between Two Discriminators** We also empirically estimate the agreement level between two discriminators while training. In Figure 10, the  $y$ -axis denotes the percentage of predictions that reach a consensus by  $D_1$  and  $D_2$ . The smoothed curve depicts the overall change of the agreement level. At the initial stage,  $D_i$  is not encouraged to agree overly on its peer discriminator  $D_j$ . As the training progresses, the agreement level gradually increases to a high value to help the convergence. The shaded red line means that the practical agreement level fluctuates around the smoothed line, incurs a certain degree of randomness and prevents discriminators from getting stuck in a local optimum.

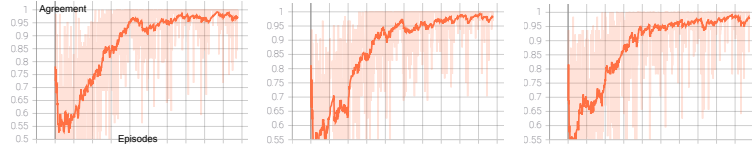

**Fig. 10.** The agreement level between  $D_1$  and  $D_2$  in DuelGAN with  $\beta = 0.25$  on STL-10 dataset, left:  $\alpha = 0.3$ ; middle: 0.5; right:  $\alpha = 0.7$ .
